# Supplementary material for: Monolithic zirconia aerogel from polyacetylacetonatozirconium precursor and ammonia hydroxide gel initiator: formation mechanism, mechanical strength and thermal properties
Source: Royal Society of Chemistry journal article supplement (doi:10.1039/c8ra08263d), 2018-01-01
Supplement: c8ra08263d1.pdf [file c8ra08263d1.pdf]

**Monolithic zirconia aerogel from  
polyacetylacetonatozirconium precursor and ammonia  
hydroxide gel initiator : formation mechanism, mechanical  
strength and thermal properties.**

Benxue Liu <sup>a\*</sup>, Min Gao <sup>a</sup>, Xiaochan Liu <sup>a</sup>, Yongshuai Xie <sup>b</sup>, Xibin Yi <sup>a\*</sup>, Luyi Zhu <sup>b</sup>,  
Xinqiang Wang <sup>b</sup>, Xiaodong Shen <sup>a,c</sup>

<sup>a</sup> *Qilu University of Technology (Shandong Academy of Science), Advanced Materials  
Institute, Shandong Provincial Key Laboratory for Special Silicone-Containing  
Materials, Jinan 250014, P. R. China.*

<sup>b</sup> *State Key Laboratory of Crystal Materials and Institute of Crystal Materials,  
Shandong University, Jinan 250100, P. R. China.*

<sup>c</sup> *College of Materials Science and Engineering, Nanjing Tech University, Nanjing  
210009, P. R. China.*

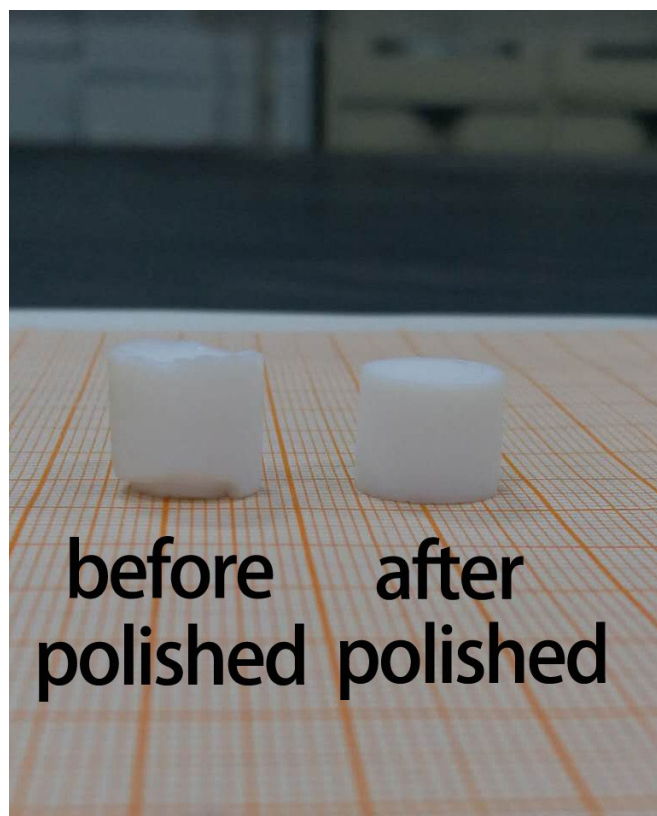

Figure S1. Photograph of  $\text{ZrO}_2$  aerogel cylinders before polished on sand paper with obvious meniscus and after polished generating flat surfaces.

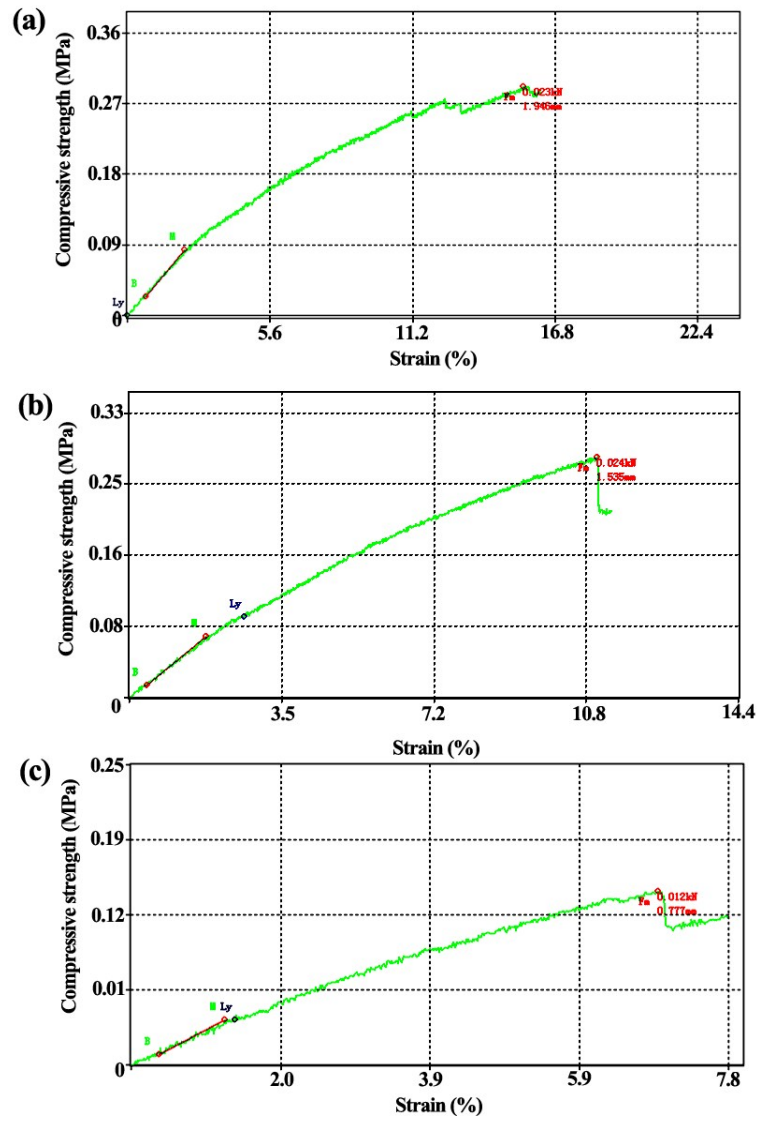

Figure S2. Stress-strain curves of (a) NH<sub>3</sub>-1, (b) NH<sub>3</sub>-2 and (c) NH<sub>3</sub>-3 ZrO<sub>2</sub> aerogel.

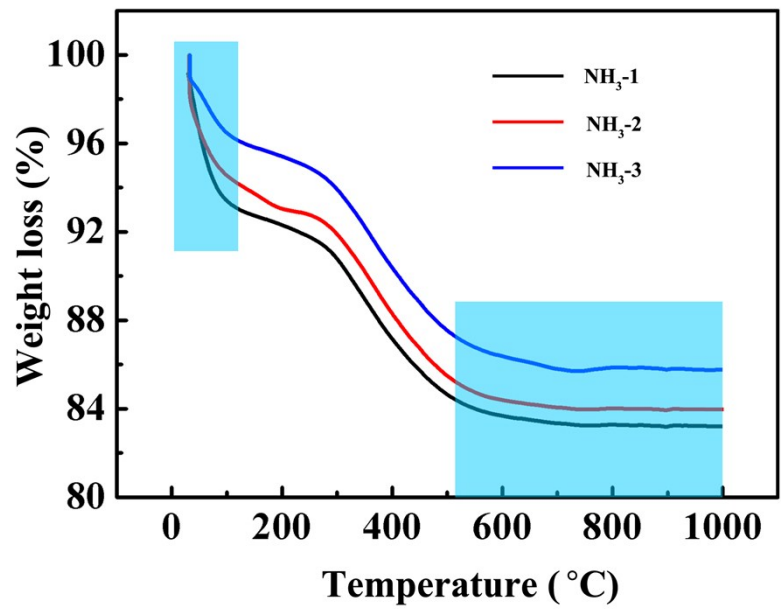

Figure S3. TG curves of the NH<sub>3</sub>-1, NH<sub>3</sub>-2 and NH<sub>3</sub>-3 ZrO<sub>2</sub> aerogel.
